# Supplementary material
Source: Springer Nature journal article supplement (https://www.springermedizin.de/resource/supplementary/12958_2014_1297_MOESM3_ESM.pdf/9567032)
Supplement: MOESM3 [file 9567032]

Diffuse mature villi hypoplasia

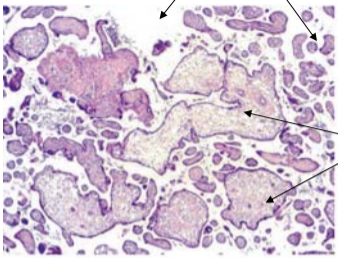

Hydropic immature villi

Trisomy 21

Immature villi

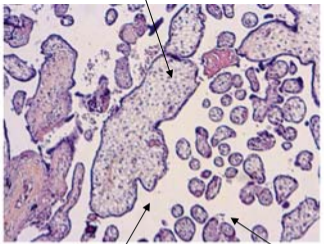

Enlarged inter villi chamber

Major mature villi hypoplasia

Trisomy 18

Numerous regular mature villi

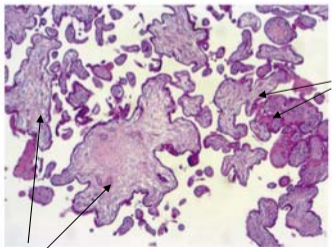

Immature hydropic villi

Trisomy 13

Fibrin deposits

Fibrin deposits

Trophoblastic tissue

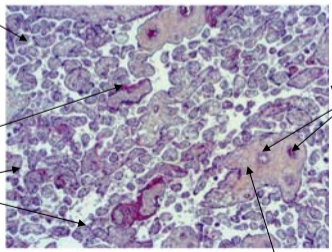

Fetal vessels

Control

Vascularised villous tree
